# Supplementary material
Source: Springer Nature journal article supplement (https://www.springermedizin.de/resource/supplementary/12885_2008_1517_MOESM4_ESM.pdf/9472220)

**[<sup>35</sup>S]- Radioactivity  
(cpm x 10<sup>3</sup> / 5 x 10<sup>5</sup> cells)**

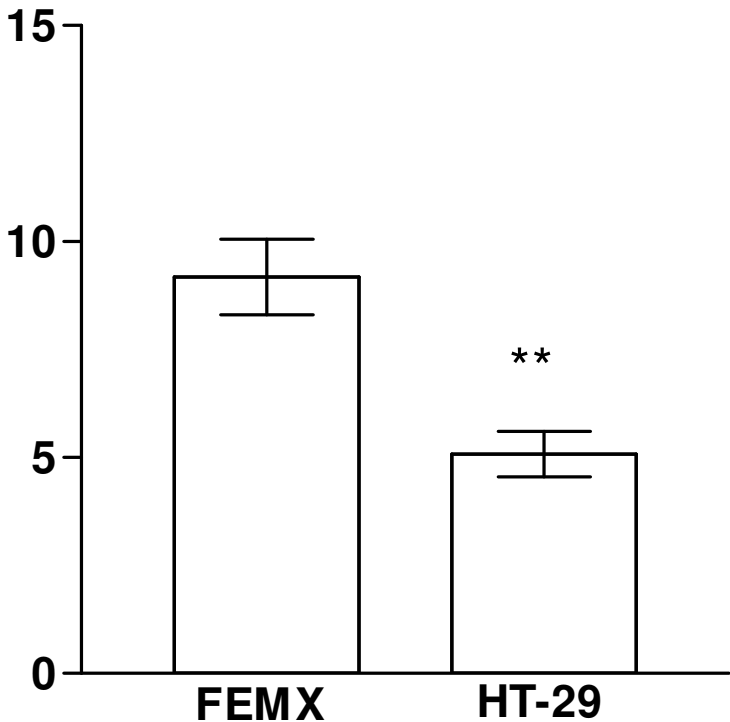

Supplement: MOESM4 [file 9472220]
